# Supplementary material for: Transcriptomics Reveals the ERF2-bHLH2-CML5 Module Responses to H2S and ROS in Postharvest Calcium Deficiency Apples
Source: MDPI journal article supplement (doi:10.3390/ijms222313013), 2021-12-01
Supplement: s1 [file s1]

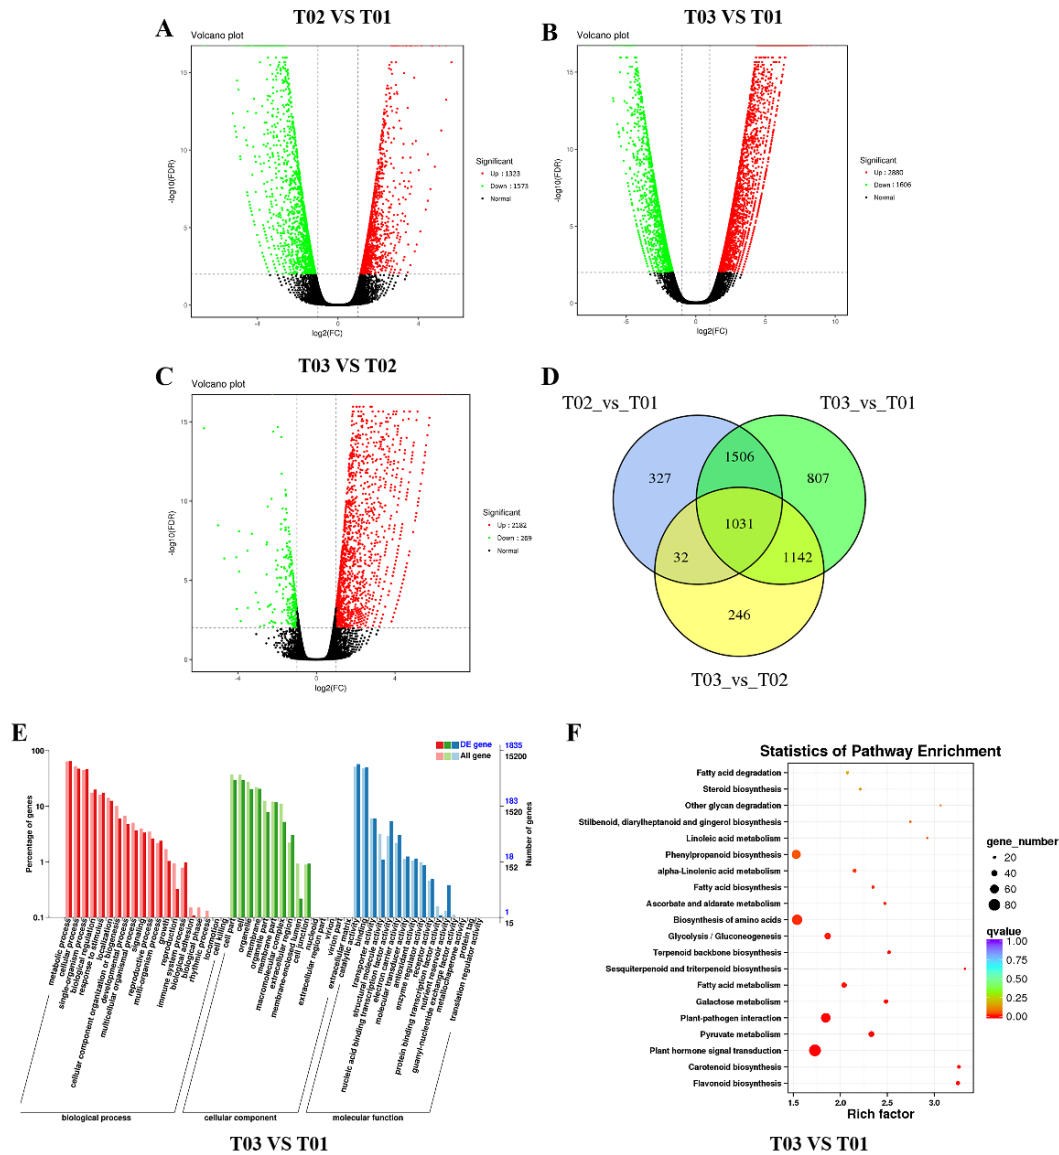

**Figure S1.** Differential expression analysis and enrichment analysis among sequencing samples. **(A)** Volcano map of DGEs between T02 and T01. **(B)** Volcano map of DGEs between T03 and T01. **(C)** Volcano map of DGEs between T03 and T02. **(D)** Venn diagram of co-DGEs among the samples. **(E)** GO classification and the enrichment analysis of DEGs. **(F)** KEGG enrichment analysis of DEGs. T01, diseased peels of calcium-deficient apples; T02, healthy peels of calcium-deficient apples; T03, peels of calcium-sufficient apples. Negative  $\log_{10}$  P values indicate the y-axes, and  $\log_2$ -fold changes indicate the x-axes.

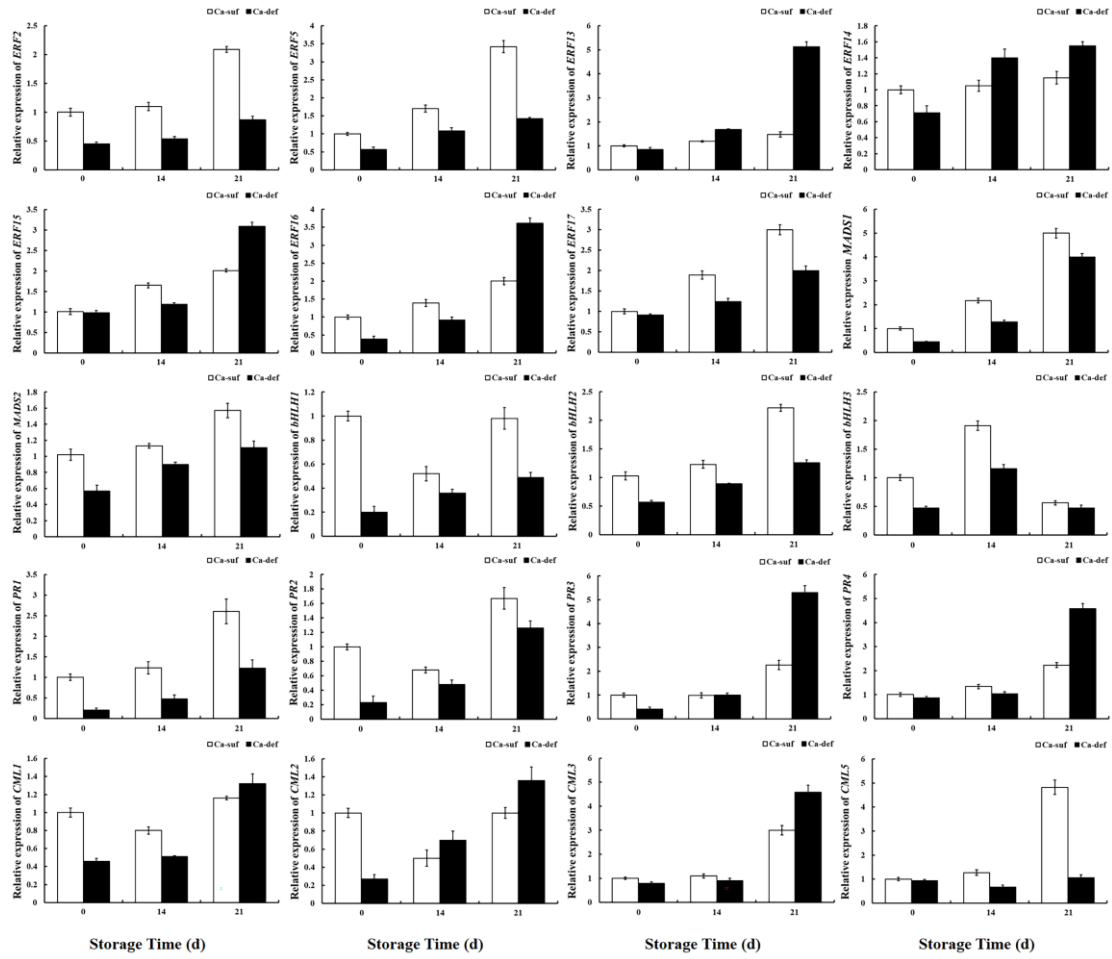

**Figure S2.** Expression pattern analysis of DEGs (*ERF2*, *ERF5*, *ERF13*, *ERF14*, *ERF15*, *ERF16*, *ERF17*, *MADS1*, *MADS2*, *bHLH1*, *bHLH2*, *bHLH3*, *PR1*, *PR2*, *PR3*, *PR4*, *CML1*, *CML2*, *CML3* and *CML5*) in apple peels under calcium sufficiency and deficiency with storage at 0, 14, 21 DAS. Ca-suf, Ca sufficiency; Ca-def, Ca deficiency. Data are presented as means  $\pm$  SD (n = 3). Gene expression of *MdUBQ* (*UBQ*, accession number MDU74358) was used as a normalization gene, and relative gene expression was determined using the  $2^{-\Delta\Delta CT}$  method to calculate.

Figure S3

| Gene name | LOG2 fold change |         |               | RT-qPCR |        |               |
|-----------|------------------|---------|---------------|---------|--------|---------------|
|           | Ca-suf           | Ca-def  | Ca-suf/Ca-def | Ca-suf  | Ca-def | Ca-suf/Ca-def |
| ERF2      | 628.97           | 143.02  | 4.40          | 4.56    | 2.27   | 2.01          |
| ERF5      | 121.28           | 9.72    | 12.48         | 4.05    | 2.66   | 1.52          |
| ERF13     | 0.54             | 60.54   | 0.01          | 1.88    | 2.87   | 0.66          |
| ERF14     | 6.77             | 75.66   | 0.09          | 3.27    | 3.81   | 0.86          |
| ERF15     | 1.66             | 71.69   | 0.02          | 2.48    | 4.32   | 0.57          |
| ERF16     | 4.24             | 398.90  | 0.01          | 0.96    | 1.24   | 0.77          |
| ERF17     | 177.42           | 12.83   | 13.83         | 4.24    | 2.46   | 1.72          |
| MADS1     | 270.98           | 86.53   | 3.13          | 10.39   | 9.08   | 1.14          |
| MADS2     | 228.16           | 59.12   | 3.86          | 10.85   | 6.58   | 1.65          |
| bHLH1     | 249.49           | 25.61   | 9.74          | 0.62    | 0.29   | 2.14          |
| bHLH2     | 658.29           | 25.99   | 25.33         | 7.11    | 4.53   | 1.57          |
| bHLH3     | 781.14           | 37.29   | 20.95         | 0.22    | 0.11   | 2.00          |
| PR1       | 197.82           | 88.19   | 2.24          | 2.70    | 1.32   | 2.05          |
| PR2       | 21.90            | 102.37  | 0.21          | 1.75    | 1.34   | 1.31          |
| PR3       | 10.39            | 401.69  | 0.03          | 2.66    | 5.79   | 0.46          |
| PR4       | 17.37            | 3935.32 | 0.00          | 8.82    | 13.36  | 0.66          |
| CML1      | 6.33             | 108.69  | 0.06          | 15.03   | 20.82  | 0.72          |
| CML2      | 15.58            | 201.79  | 0.08          | 1.01    | 1.38   | 0.73          |
| CML3      | 10.74            | 252.54  | 0.04          | 5.46    | 7.82   | 0.70          |
| CML5      | 108.54           | 27.91   | 3.89          | 8.16    | 6.92   | 1.18          |

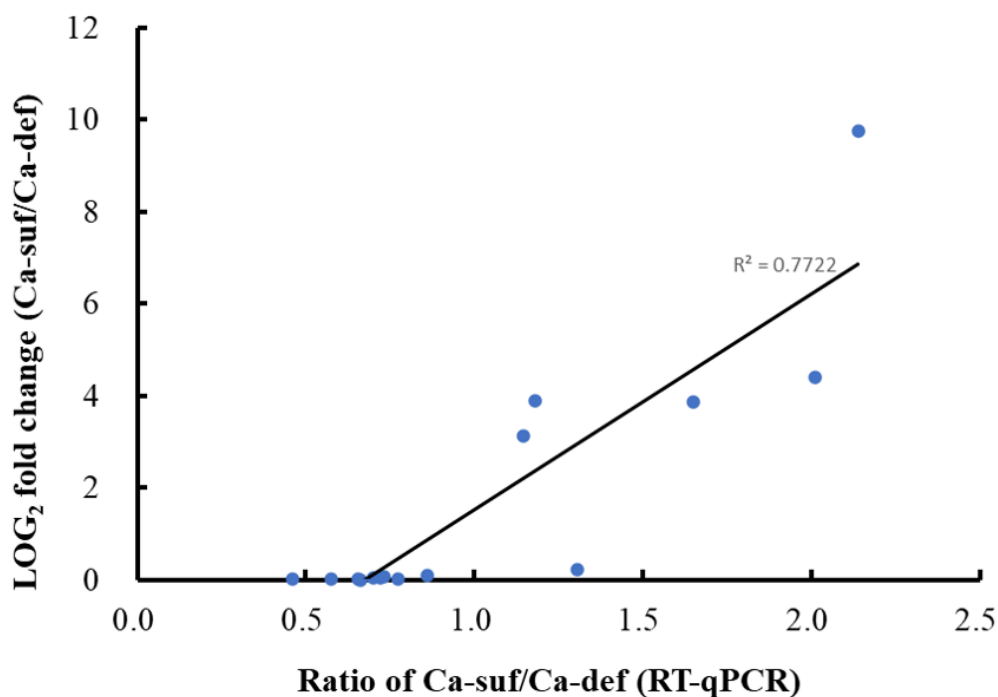

Figure S3. Correlation analysis of the RNA-seq results and RT-qPCR results for the DEGs.

Table S1. Real-time qPCR primers used in this study.

| Gene name      | Gene ID      | Primer sequence (5'-3')                               |
|----------------|--------------|-------------------------------------------------------|
| <i>MdERF2</i>  | MD13G1163300 | F-GTTGTTGTTTCGCTGGTGATG<br>R- CCTTCCCTCATAATGACGATCC  |
| <i>MdERF5</i>  | MD17G1226700 | F- GCCGGTTCTTGCTTCATTTT<br>R- CCCACAGATGAGCTTCGTATC   |
| <i>MdERF13</i> | MD14G1147100 | F-GGTTGAATCGGAGGAGAAAGAG<br>R- CACCTGAGCTAGAGCTGAAAC  |
| <i>MdERF14</i> | MD16G1140800 | F-GAAGCATCAGAGGAGAAAGAGAG<br>R- CTTGAGTGAGAGCAGAAACCA |
| <i>MdERF15</i> | MD07G1248400 | F-CAGCTACTGCATCTCCTACTTG                              |

|                 |              |                                                          |
|-----------------|--------------|----------------------------------------------------------|
| <i>MdERF16</i>  | MD06G1130400 | R- GTCCTCCCACCTGATACTGATA<br>F- CCGAAAGAGTTCAGGGAAGAAT   |
| <i>MdERF17</i>  | MD01G1177200 | R- GTGGTGGTCCGTAATACTTTGA<br>F- CGAGTACTCATCCCTCTCTGAA   |
| <i>MdbHLH1</i>  | MD13G1150900 | R- CGGGTTTTCGTTTTCGGAATTTG<br>F- TCTGATTTCTGAATCCCGTAGC  |
| <i>MdbHLH2</i>  | MD06G1133200 | R- GGTGGAGGTGGTCTTGTTT<br>F- CTCTCGGTGAAACTTGACTCTT      |
| <i>MdbHLH3</i>  | MD17G1049300 | R- GTGACGTGGGACTGAACATAA<br>F- CATGTCTAGCAGAGGGTCAAG     |
| <i>MdMADS1</i>  | MD06G1204300 | R- CTCAGGAACCAAGTTGACGTAAT<br>F- AGAACCTGCATGTGCTTATAG   |
| <i>MdMADS2</i>  | MD16G1058500 | R- TGAGACAACCTACGCTGAAAC<br>F- GGCACGGACCAAGTACATAATA    |
| <i>MdPR1</i>    | MD10G1017300 | R- GAGATTTACTACACCAGGCTTCTC<br>F- ACCGTTCTTATATGACTGGAGA |
| <i>MdPR2</i>    | MD10G1286300 | R-AGAGAGAGAGAGAGAGACCTTTG<br>F- CACATCCATCGTCAACCAAATC   |
| <i>MdPR3</i>    | MD05G1017400 | R- TGCAGAGTCACGGATTTTCAG<br>F- ATGGCCTCACCAAGAGTTAAG     |
| <i>MdPR4</i>    | MD05G1110000 | R- GTTGACAGCACCATAGTTAGGA<br>F- GACTCATGCCCAAGACACA      |
| <i>MdCML1</i>   | MD12G1087300 | R- CTATATTGTCCTCCCACGTCAAG<br>F- CGTCATCCTCTTCCTCATACAC  |
| <i>MdCML2</i>   | MD06G1231000 | R- GACCACTCACCCGATCTTTC<br>F- CAAAGACGCCTTCGATCTCTAC     |
| <i>MdCML3</i>   | MD04G1178900 | R- ATCGTGCAGGCCATGTT<br>F- CGCCGCATCTTTGATATGTTT         |
| <i>MdCML4</i>   | MD16G1169000 | R- CAGTGTCTAACCCGAGAAGTG<br>F- GTTCCTCTGGTGGATGGATTC     |
| <i>MdCML5</i>   | MD08G1043100 | R- CTCGTTCCATCCGTGCATAA<br>F- ACGACGGATCGATTACAAAG       |
| <i>MdDCD1</i>   | MD14G1242800 | R- AGCACGACAACCTCCAATCTC<br>F- CTGTGACGACCCTGATTACTTC    |
| <i>MdDCD2</i>   | MD06G1235700 | R- CCCAGACCTTTGGCATTCT<br>F- ACACCAAGAACAGCTACGATAC      |
| <i>MdDCD3</i>   | MD06G1235800 | R- GGTCATCACGTTGTCCAAGA<br>F- ATCTCCTGGTTGAGCGTTTAG      |
| <i>MdDCD4</i>   | MD13G1105700 | R- CTCAGAGGTGGTAACTGCATAG<br>F- CTCCAACATTACCAACCCATCT   |
| <i>MdLCD1</i>   | MD12G1200100 | R- TCCAACCTTTTCGCGCCTTATTA<br>F- ACCGCTCTTCTCTCTCTCTT    |
| <i>MdLCD2</i>   | MD04G1186700 | R- CCATTTGGCGATTAGGGTTTG<br>F- GTTGCACCATCCTGTTGTTTC     |
| <i>MdLCD3</i>   | MD15G1421300 | R- TTGCGGGCTATAATCCCTATTC<br>F- CATCTCGCCGTCTACTTCTTG    |
| <i>MdSiR1</i>   | MD05G1081500 | R- GTCCTTACGCTTCCTTCAGTT<br>F- TCCTCGTCTCTCTCTCAATTCC    |
| <i>MdOASTL1</i> | MD06G1007300 | R- GGGATGGTGACATGGTTGATAG<br>F- AGTTTCGACAACCTTGCTAATC   |
| <i>MdTUB</i>    | GO562615     | R- AACCGTCCTACACCAGAAATG<br>F- ACACGGGGAGGTAGTGACAA      |
| <i>MdUBQ</i>    | MDU74358     | R- CCTCCAATGGATCCTCGTTA<br>F- CTCGTTGGTGGTTTTTAAAGT      |
|                 |              | R- GGAGGCAGAAACAGTACCAT                                  |

**Table S2.** Primers used in this study for developing the constructs.

| The purpose                                          | The primers           | The sequences of the primer (5'-3')             |
|------------------------------------------------------|-----------------------|-------------------------------------------------|
| For construction of re-combinant vector of pSAK277   | <i>ERF2-EcoRI-F</i>   | actagtggatccaaagaattcATGTGTGGTGGTGCTATCATTTC    |
|                                                      | <i>ERF2-XbaI-R</i>    | tcattaaagcaggactctagaTTAATACAGAAGCTGCCCTTGTTG   |
|                                                      | <i>ERF17-EcoRI-F</i>  | actagtggatccaaagaattcATGGTAATTAGCTTCCCCTTCTGC   |
|                                                      | <i>ERF17-XbaI-R</i>   | tcattaaagcaggactctagaTCAAGCACCTTCTCCTTCCCA      |
|                                                      | <i>bHLH2-EcoRI-F</i>  | actagtggatccaaagaattcATGGCAGCCTTTTCATACCAAA     |
| For construction of pGreen II 0800-LUC binary vector | <i>bHLH2-XbaI-R</i>   | tcattaaagcaggactctagaTTAATTGAAAGAACACAAGTTGCTGT |
|                                                      | <i>CML5-HindIII-F</i> | gtcgacggatcgataagcttTAAAGGTATGAGCACGGAAACTGA    |
|                                                      | <i>CML5-BamHI -R</i>  | cgcctctagaactagtggatccTGCTGTCGTCTGCAACAATTCA    |
